# Supplementary material for: Development of a DNA biosensor based on MCM41 modified screen-printed graphite electrode for the study of the short sequence of the p53 tumor suppressor gene in hybridization and its interaction with the flutamide drug using hemin as the electrochemical label
Source: Royal Society of Chemistry journal article supplement (doi:10.1039/c9nj04569d), 2020-01-01
Supplement: c9nj04569d1.pdf [file c9nj04569d1.pdf]

## Supplementary Information

### **Development of a DNA biosensor based on MCM41 modified screen-printed graphite electrode for the study of short sequence of p53 tumor suppressor gene hybridization and its interaction with flutamide drug using hemin as the electrochemical label**

Jahan Bakhsh Raof<sup>\*a</sup>, Zahra Bagheryan<sup>a</sup>, Ayemeh Bagheri Hashkavayi<sup>a,b</sup>

<sup>a</sup>Electroanalytical Chemistry Research Laboratory, Department of Analytical Chemistry, Faculty of Chemistry, University of Mazandaran, Babolsar, Iran

<sup>b</sup>Department of Chemical Industry, Faculty of Alzahra, Bushehr Branch, Technical and Vocational University (TVU), Bushehr, Iran

**Table S1.** Comparison of the analytical performance between the proposed sensor and other electrochemical detection methods for flutamide.

| Sensing surface                                  | Method | LR                                              | LOD                  | Ref.      |
|--------------------------------------------------|--------|-------------------------------------------------|----------------------|-----------|
| Gold electrode                                   | DPV    | 6 to 60 $\mu\text{M}$ and 100–600 $\mu\text{M}$ | 1.8 $\mu\text{M}$    | [1]       |
| Ag nanoparticle decorated reduced graphene oxide | DPV    | 0.1 to 0.3 mM                                   | 1.16 $\mu\text{M}$ . | [2]       |
| Boron-doped diamond electrode                    | DPV    | 0.99–42.9 $\mu\text{M}$                         | 0.42 $\mu\text{M}$   | [3]       |
| mercury electrode                                | DPV    |                                                 | 0.19 $\mu\text{M}$   | [4]       |
| Ag nanoparticles/ glassy carbon electrode        | DPV    | 10–1000 $\mu\text{M}$                           | 9.33 $\mu\text{M}$   | [5]       |
| Carbon screen printed electrode                  | DPV    | 0.7 to 10 $\mu\text{M}$                         | 0.1 $\mu\text{M}$    | This work |

1. Mehrabi, A., Rahimnejad, M., Mohammadi, M., & Pourali, M. (2019). Electrochemical detection of flutamide with gold electrode as an anticancer drug. *Biocatalysis and Agricultural Biotechnology*, **22**, 101375.

2. Banerjee, S., Mondal, S., Madhuri, R., & Sharma, P. K. (2017, May). Electrochemical performance of Ag nanoparticle decorated reduced graphene oxide in determination of anticancer drug flutamide. In *AIP Conference Proceedings* (Vol. 1832, No. 1, p. 050067). AIP Publishing.

3. Švorc, L., Borovska, K., Cinková, K., Stanković, D. M., & Planková, A. (2017). Advanced electrochemical platform for determination of cytostatic drug flutamide in various matrices using a boron-doped diamond electrode. *Electrochimica Acta*, **251**, 621-630.

4. Hammam, E., El-Desoky, H. S., El-Baradie, K. Y., & Beltagi, A. M. (2004). Three validated stripping voltammetric procedures for determination of the anti-prostate cancer drug flutamide in tablets and human serum at a mercury electrode. *Canadian journal of chemistry*, **82(9)**, 1386-1392.

5. Ahmadi, F., Raoof, J. B., Ojani, R., Baghayeri, M., Lakouraj, M. M., & Tashakkorian, H. (2015). Synthesis of Ag nanoparticles for the electrochemical detection of anticancer drug flutamide. *Chinese Journal of Catalysis*, **36(3)**, 439-445.
